# Supplementary material for: The retromer complex safeguards against neural progenitor-derived tumorigenesis by regulating Notch receptor trafficking
Source: eLife. 2018 Sep 4;7:e38181. doi: 10.7554/eLife.38181 (PMC6140715; doi:10.7554/eLife.38181)
Supplement: Figure 1—source data 1. [file elife-38181-fig1-data1.xlsx]

## Sheet: Sheet1
Figure 1-source data
Sample size (n), mean, STDEV are presented for the data in Figure 1E
Figure 1E: Quantification of total neuroblast number per larval brain lobe of indicated genotypes.
Genotype	n	mean	STDEV
WT	13	97.2	4
insc-Gal4 > vps26-IR	14	301.8	26.4
insc-Gal4 > vps26-IR; Vps26	16	97.1	5
vps35	12	843.6	66.7
vps35; insc-Gal4 > hVps35	13	121.2	16.6
vps35; insc-Gal4 > Vps35	15	100.2	5.3
vps35; PntP1-Gal4 > Vps35	12	97.8	2.9
vps35; erm-Gal4 (II) > Vps35	14	108.6	16.4
vps35; erm-Gal4 (III) > Vps35	12	436.7	45.5
