# Supplementary material for: The retromer complex safeguards against neural progenitor-derived tumorigenesis by regulating Notch receptor trafficking
Source: eLife. 2018 Sep 4;7:e38181. doi: 10.7554/eLife.38181 (PMC6140715; doi:10.7554/eLife.38181)
Supplement: Figure 3—source data 1. [file elife-38181-fig3-data1.xlsx]

## Sheet: Sheet1
Figure 3-source data
Sample size (n), mean, STDEV, and student t test are presented for the data in Figure 3E
Figure 3E: Quantification of total neuroblast number per larval brain lobe of indicated genotypes.
Genotype	n	mean	STDEV
WT	13	97.2	4
vps35; insc-Gal4 > w-IR	11	766.3	64.8
vps35; insc-Gal4 > N-IR	10	88.6	3
vps35; PntP1-Gal4 > Dl-IR	18	98.1	6.9
vps35; erm-Gal4 (II) > Dl-IR	11	179.5	36.3
vps35; PntP1-Gal4 > Kuz-DN	11	102.9	11.6
vps35; erm-Gal4 (II) > Kuz-DN	12	220	62.1
vps35; PntP1-Gal4 > Psn-DN	10	88.7	3.1
vps35; insc-Gal4 > wg-IR	15	778	53.2
vps35; insc-Gal4 > Ptc-DN	10	694	86.5
