# Supplementary material for: The retromer complex safeguards against neural progenitor-derived tumorigenesis by regulating Notch receptor trafficking
Source: eLife. 2018 Sep 4;7:e38181. doi: 10.7554/eLife.38181 (PMC6140715; doi:10.7554/eLife.38181)
Supplement: Figure 5—source data 1. [file elife-38181-fig5-data1.xlsx]

## Sheet: Sheet1
Figure 5-source data
Sample size (n), mean, STDEV, and student t test are presented for the data in Figure 5C
Figure 5C: Quantification of total neuroblast number per larval brain lobe of indicated genotypes.
Genotype	n	mean	STDEV
vps35	12	843.6	66.7
vps35; PntP1-Gal4 > Rab5-DN	10	97.9	2.1
vps35; PntP1-Gal4 > Rab7-CA	11	144.5	15.9
vps35; PntP1-Gal4 > Rab9-CA	11	160	25.3
vps35; insc-Gal4; Gal80ts> Hrs	12	103.6	9.6
