# Supplementary material for: The retromer complex safeguards against neural progenitor-derived tumorigenesis by regulating Notch receptor trafficking
Source: eLife. 2018 Sep 4;7:e38181. doi: 10.7554/eLife.38181 (PMC6140715; doi:10.7554/eLife.38181)
Supplement: Figure 6—source data 1. [file elife-38181-fig6-data1.xlsx]

## Sheet: Sheet1
Figure 6-source data
Sample size (n), mean, STDEV, and student t test are presented for the data in Figure 6B,D,H
Figure 6B: Quantification of total neuroblast number per larval brain lobe of indicated genotypes.
Genotype	n	mean	STDEV
vps35	12	843.6	66.7
vps35; insc-Gal4 > Su(dx)	12	710	89.6
vps35; insc-Gal4 > Ndfip	13	789	47.9
vps35; insc-Gal4 > Su(dx); Ndfip	15	102.4	5.2
Figure 6D: Quantification of total neuroblast number per larval brain lobe of indicated genotypes.
Genotype	n	mean	STDEV
WT	13	97.2	4
PntP1-Gal4 > vps26-IR	15	212.3	20.7
PntP1-Gal4 > Su(dx)-DN	14	105.6	5.2
PntP1-Gal4 > vps26-IR; Su(dx)-DN	13	601	29.6
Figure 6H: Quantification of total neuroblast number per larval brain lobe of indicated genotypes.
Genotype	n	mean	STDEV
WT	13	97.2	4
vps35	12	843.6	66.7
vps35; insc-Gal4 > hrs-IR	11	850	75.4
vps35; insc-Gal4 > Su(dx); Ndfip; w-IR	13	95.2	3.3
vps35; insc-Gal4 > Su(dx); Ndfip; hrs-IR	15	798	54.9
