# Supplementary material for: The retromer complex safeguards against neural progenitor-derived tumorigenesis by regulating Notch receptor trafficking
Source: eLife journal article supplement (doi:10.7554/elife.38181), 2018-09-03
Supplement: figures [file elife-38181-figures-v2.pdf]

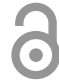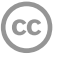

---

## Figures and figure supplements

The retromer complex safeguards against neural progenitor-derived tumorigenesis by regulating Notch receptor trafficking

**Bo Li et al**

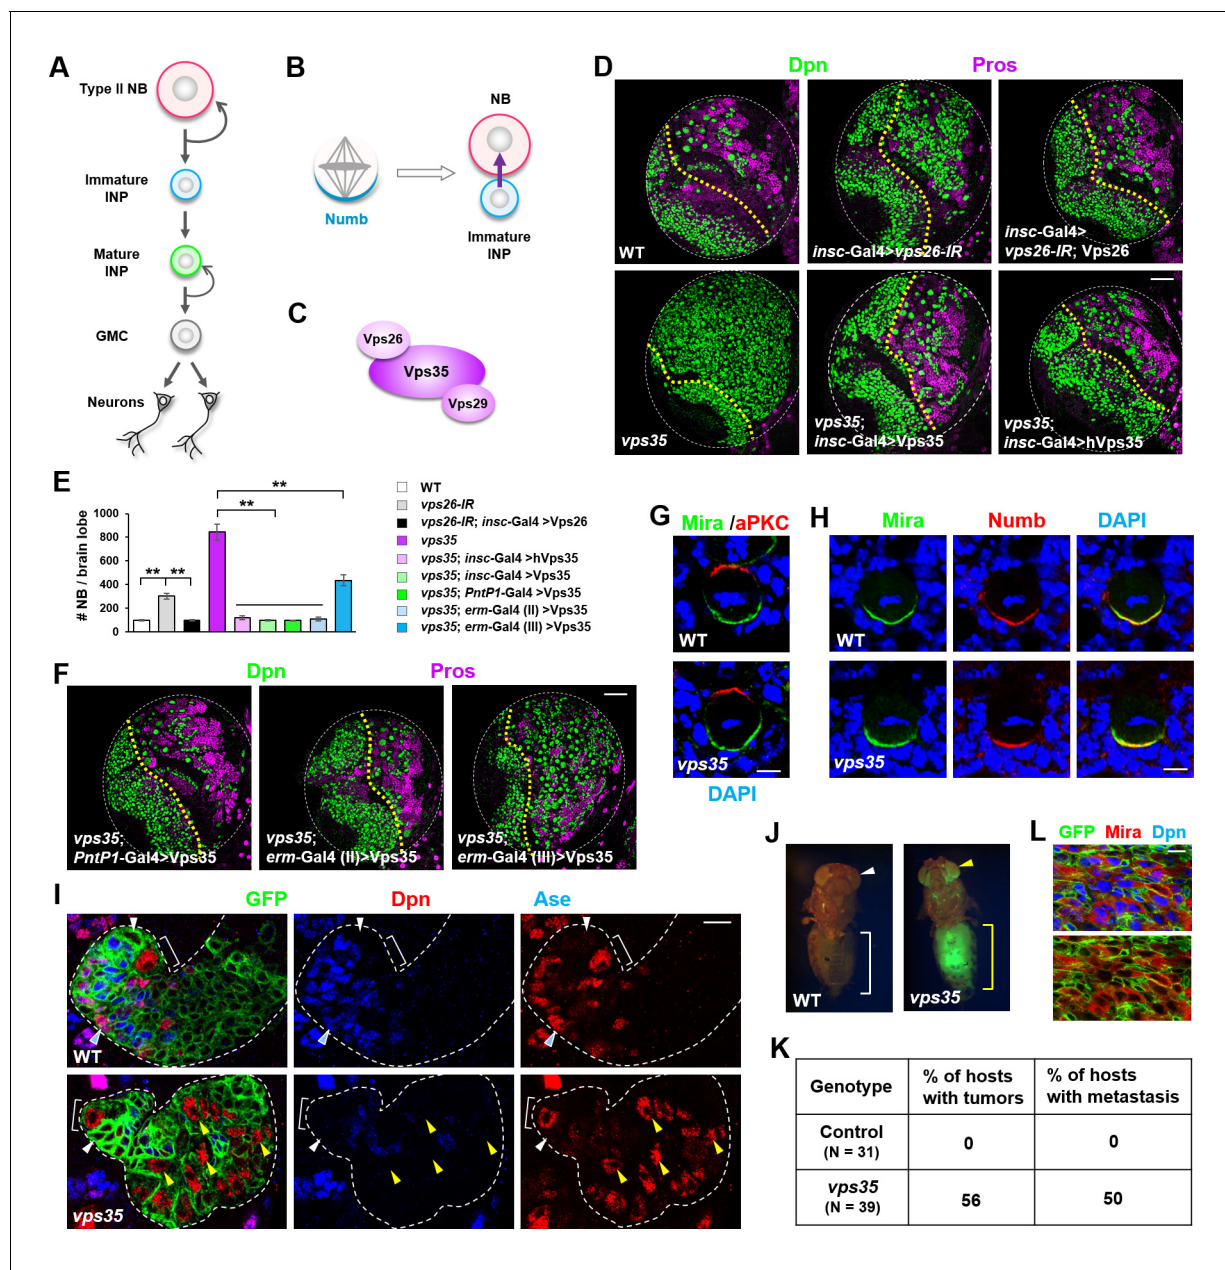

**Figure 1.** Dedifferentiation of *vps35* mutant neural progenitors causes the formation of transplantable tumors. (A) Diagram depicting the lineage hierarchy of *Drosophila* type II neuroblasts in the central brain area. (B) Schematic showing how asymmetric distribution and segregation of the endocytic protein Numb (cyan) initiates unidirectional Notch signaling (purple arrow) from a neural progenitor (light blue) to its sibling type II neuroblast (pink). (C) Schematic of the cargo-recognition retromer complex. (D–F) Larval brain lobes of indicated genotypes were stained for neuroblast marker Deadpan (Dpn) and ganglion mother cell (GMC)/neuronal marker Prospero (nuclear Pros) (D,F). In this and subsequent micrographs, yellow dotted line marks the boundary between the optic lobe (left) and the central brain (right) areas. Quantification of total neuroblast number per brain lobe is shown in (E). \*\* $p < 0.001$  ( $n = 12–16$ ). (G) Asymmetric cortical distribution of apical marker atypical PKC (aPKC) and basal marker Miranda (Mira) in wild type (WT) or *vps35* mutant metaphase neuroblasts. (H) Colocalization of Mira and cell fate determinant Numb at the basal cortex of WT or *vps35* mutant metaphase neuroblasts. (I) MARCM clonal analysis of type II neuroblast lineages in WT control or *vps35* mutant backgrounds. In this and subsequent micrographs, type II neuroblast MARCM clones are marked by CD8-GFP and outlined by white dashed lines, whereas neuroblasts, immature intermediate neural progenitors (INPs), mature INPs and neuroblast-like dedifferentiating progenitors are marked with brackets, white arrowheads, cyan arrowheads and yellow arrowheads respectively. (J) Transplantation of GFP<sup>+</sup> tissue from WT control larval brains into the abdomens of adult host flies caused neither tumorous growth (while bracket) nor metastasis (white arrowhead). In sharp contrast, transplantation of GFP<sup>+</sup> tumor tissue from *vps35* mutant larval brains caused massive tumor formation (yellow bracket) and metastasis to distal organs such as the eyes (yellow arrowhead). (K) Table showing the frequency of tumor formation or metastasis 14 days after transplantation of GFP<sup>+</sup> tissue from larval brains of

Figure 1 continued on next page

*Figure 1 continued*

indicated genotypes. (L) GFP<sup>+</sup> tumor tissues from the transplanted hosts were isolated and stained for neuroblast markers Mira and Dpn. Note that most of the extracted GFP<sup>+</sup> tumor cells were Mira<sup>+</sup> and Dpn<sup>+</sup> neuroblast-like cells. Scale bars, 50  $\mu$ m (D,F); 5  $\mu$ m (G,H) and 10  $\mu$ m (I,L).

DOI: <https://doi.org/10.7554/eLife.38181.003>

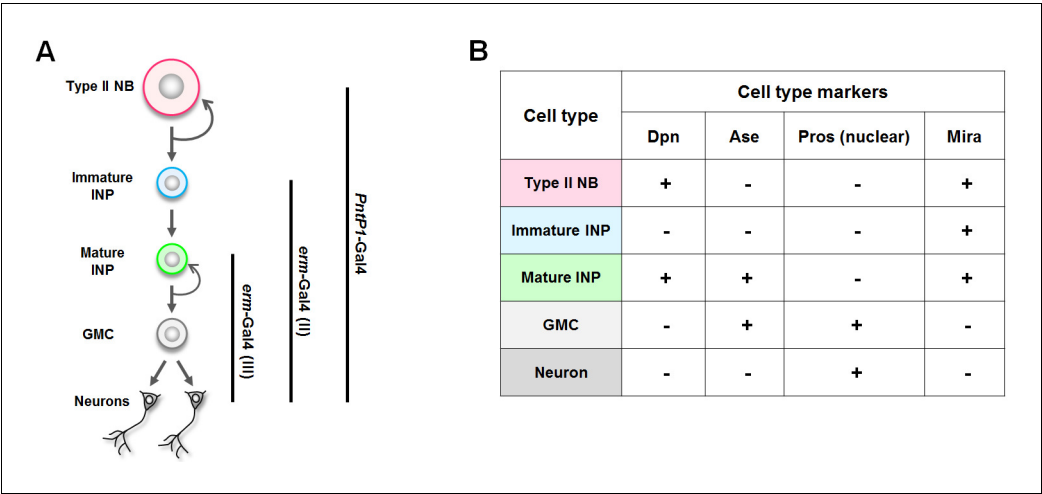

**Figure 1—figure supplement 1.** A summary of the Gal4 drivers and cell type markers used in this study. (A) The expression patterns of the Gal4 drivers. (B) The identity of each cell type in type II neuroblast lineages can be unambiguously determined by a combination of cell type markers. NB: neuroblast.  
DOI: <https://doi.org/10.7554/eLife.38181.004>



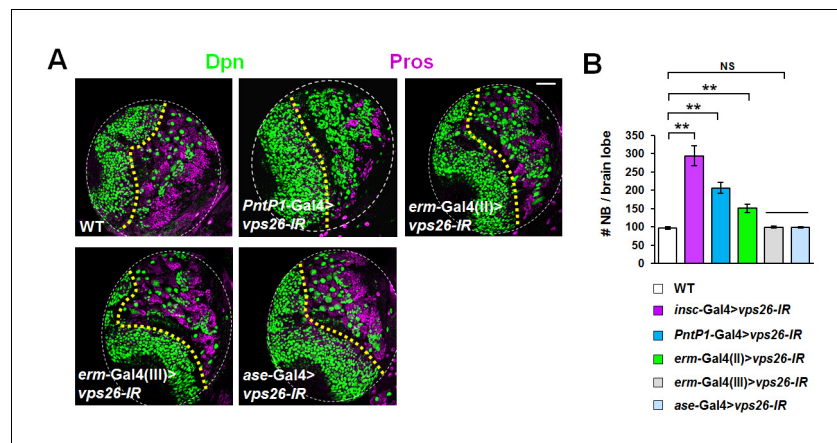

**Figure 1—figure supplement 2.** Ectopic neuroblasts formed upon retromer dysfunction are originated from immature INPs. (A,B) Larval brain lobes of indicated genotypes were stained for Dpn and Pros. Quantification of total neuroblast number per brain lobe is shown in (B). \*\* $p < 0.001$ ; NS: not significant ( $n = 10-12$ ). Note that whereas downregulation of *vps26* in type II neuroblast lineages or immature INP lineages, driven by *PntP1-Gal4* or *erm-Gal4(II)* respectively, resulted in supernumerary neuroblast phenotype, its knockdown in mature INP lineages or type I neuroblast lineages, driven by *erm-Gal4 (III)* or *ase-Gal4* respectively, failed to induce ectopic neuroblasts. Scale bar, 50  $\mu\text{m}$  (A).

DOI: <https://doi.org/10.7554/eLife.38181.005>

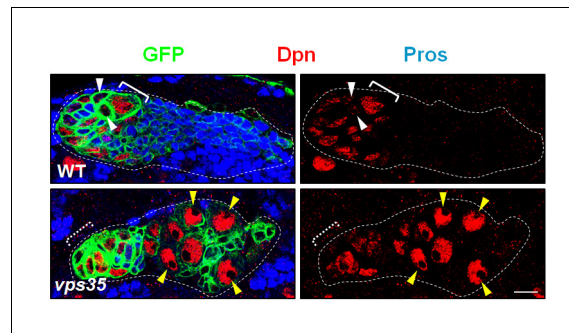

**Figure 1—figure supplement 3.** MARCM clonal analysis of wild type and *vps35* mutant neuroblasts. MARCM clones were marked by CD8-GFP and stained with Dpn and Pros. Immature INPs in WT neuroblast clone and ectopic neuroblast-like cells in *vps35* mutant clone were marked by white arrowheads and yellow arrowheads respectively. Note that Dpn<sup>+</sup> Pros<sup>-</sup> ectopic neuroblasts (yellow arrowheads) were several cell diameters away from the primary neuroblast (dashed white bracket, out of the current focal plane). Scale bar, 10  $\mu$ m.

DOI: <https://doi.org/10.7554/eLife.38181.006>

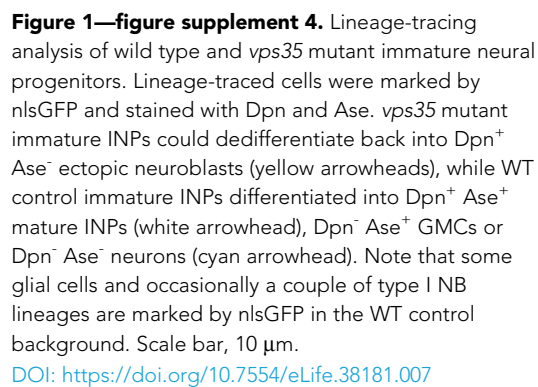

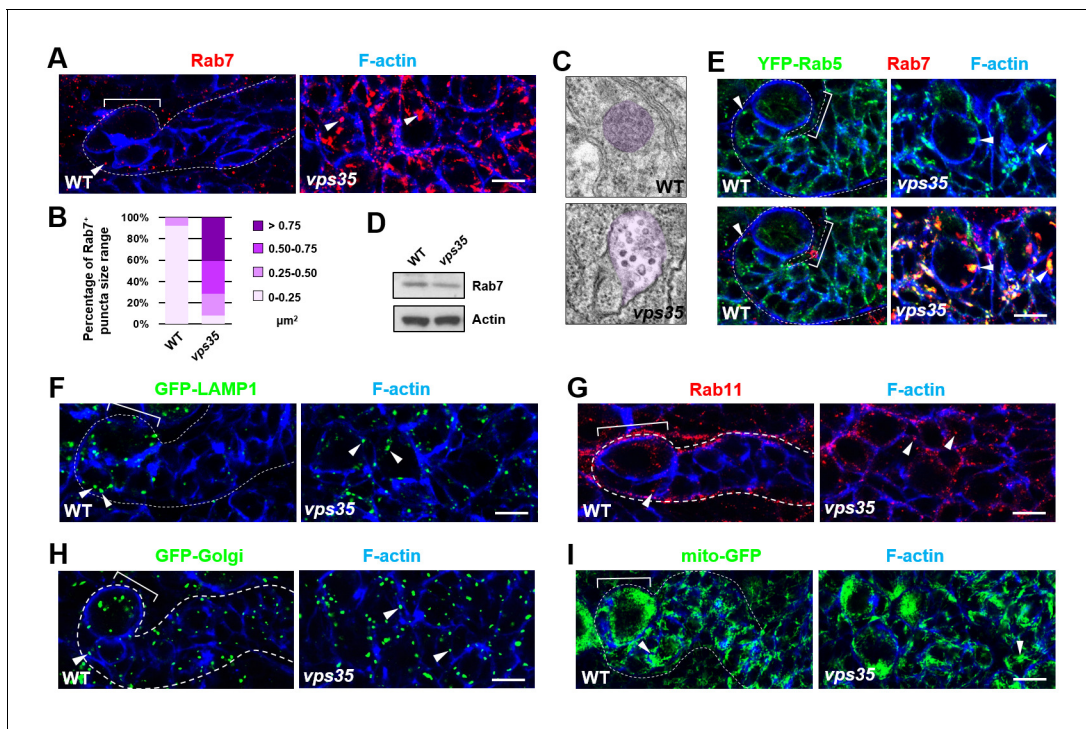

**Figure 2.** Rab7<sup>+</sup> endosomes are drastically enlarged in *vps35* mutant neuroblast lineages. (A,B) Compared to WT control immature INPs, Rab7<sup>+</sup> endosomes were dramatically enlarged in *vps35* mutant dedifferentiating neural progenitors (arrowheads in A). Quantification of the size range of Rab7<sup>+</sup> puncta in immature INPs of indicated genotypes was shown in (B). (C) Transmission electron micrograph of wild type or *vps35* mutant larval brain neuroblasts. The mean size of MVBs, identified by the presence of intraluminal vesicles, was greatly enlarged in *vps35* mutant neuroblasts. Note that neuroblasts were identified by their large cellular and nuclear sizes and MVBs are highlighted in purple. (D) Western blot analysis of larval brain extracts of indicated genotypes using anti-Rab7 antibody. Anti- $\beta$ -actin blot served as a loading control. (E) The enlarged Rab7<sup>+</sup> endosomes in *vps35* mutant neuroblast-like cells were also positive for YFP-Rab5 (arrowheads). (F–I) Compared to WT control immature INPs, the sizes of GFP-LAMP1<sup>+</sup> lysosomes (F), Rab11<sup>+</sup> recycling endosomes (G), Golgi (H) or mitochondria marked by mito-GFP (I) remained unaltered in *vps35* mutant dedifferentiating neural progenitors (arrowheads). Scale bars, 10  $\mu\text{m}$  (A,E–I).

DOI: <https://doi.org/10.7554/eLife.38181.009>

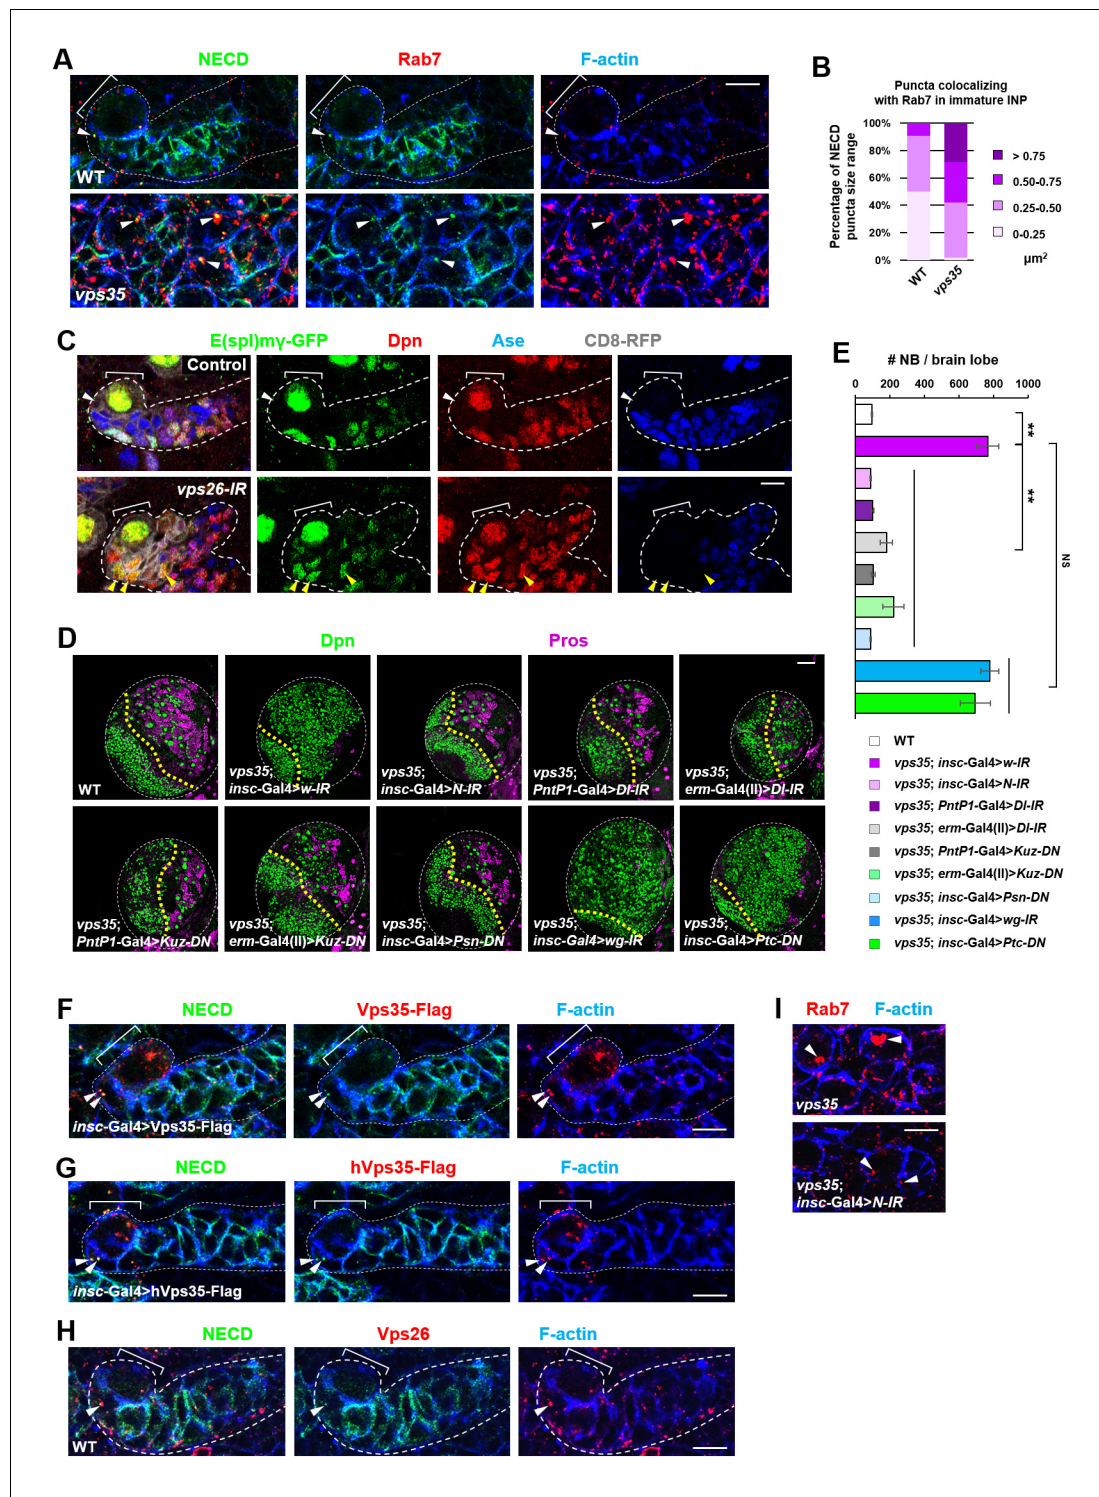

**Figure 3.** Retromer regulates Notch signaling by mediating Notch receptor endosomal trafficking. (A,B) Compared to WT control immature INPs, Notch puncta colocalizing with Rab7<sup>+</sup> endosomes were enlarged in *vps35* mutant dedifferentiating neural progenitors (arrowheads in A). Quantification of the size range of Notch puncta colocalizing with Rab7<sup>+</sup> endosomes is shown in (B). (C) The expression pattern of Notch signaling reporter E(spl)my-GFP in wild type control or *vps26*-RNAi type II neuroblast lineages. Note that immature INPs (Dpn<sup>+</sup> Ase<sup>+</sup>) in control type II neuroblast lineages and dedifferentiating neural progenitors (Dpn<sup>+</sup> Ase<sup>+</sup>) in *vps26*-RNAi lineages are marked with white arrowheads and yellow arrowheads respectively. (D,E) Larval brain lobes of indicated genotypes were stained for Dpn and Pros. Quantification of total neuroblast number per brain lobe is shown in (E). \*\*p<0.001 (n = 10–18). NS, not significant. (F) Type II neuroblast lineages expressing Vps35-FLAG were stained for Notch extracellular domain (NECD) Figure 3 continued on next page

*Figure 3 continued*

and FLAG. Note that NECD puncta (arrowheads) colocalized with Vps35-FLAG in immature INPs. (G,H) NECD puncta colocalized with FLAG-tagged human Vps35 (hVps35-FLAG; **G**) and endogenous Vps26 (**H**) in immature INPs (arrowheads). (I) Type II neuroblast lineages of indicated genotypes were stained for Rab7 and F-actin. Rab7 puncta are marked with arrowheads. Scale bars, 10  $\mu$ m (**A,C,F–I**) and 50  $\mu$ m (**D**).

DOI: <https://doi.org/10.7554/eLife.38181.010>



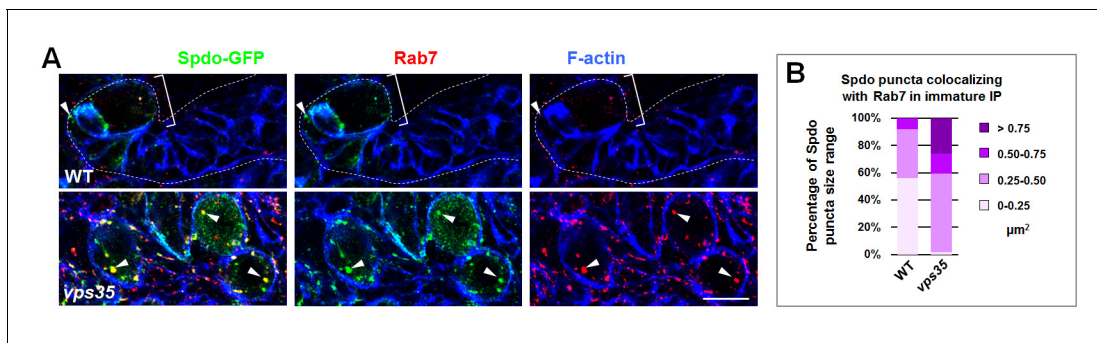

**Figure 3—figure supplement 1.** Retromer regulates endosomal trafficking of Notch cofactor Sanpodo (Spdo). (A,B) Compared to WT control immature INPs, Spdo-GFP puncta colocalizing with Rab7<sup>+</sup> endosomes were enlarged in *vps35* mutant dedifferentiating neural progenitors (arrowheads in A). Quantification of the size range of Spdo-GFP puncta colocalizing with Rab7<sup>+</sup> endosomes is shown in (B). Scale bar, 10  $\mu\text{m}$ .

DOI: <https://doi.org/10.7554/eLife.38181.011>

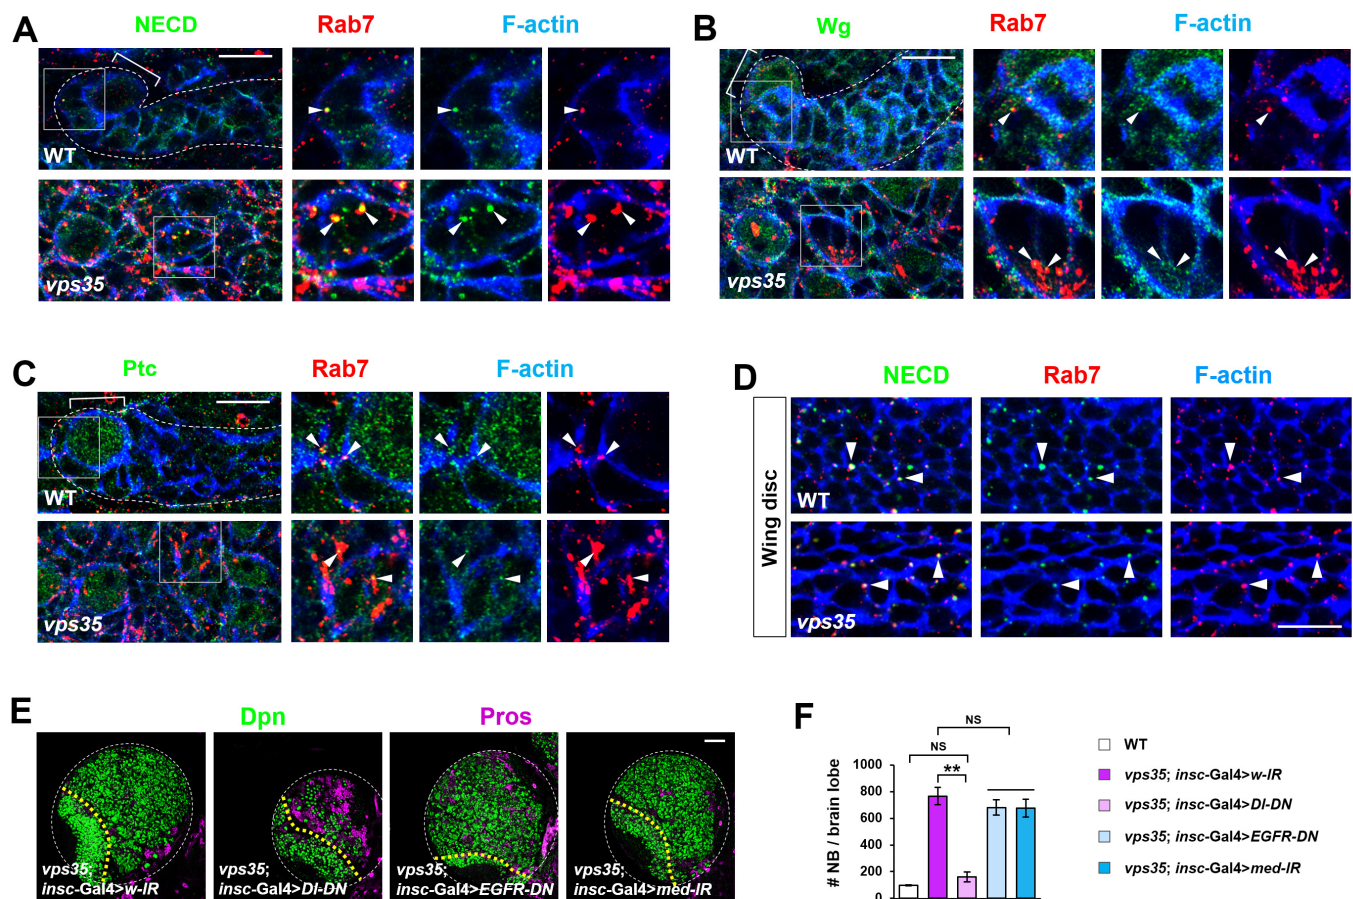

**Figure 3—figure supplement 2.** Retromer regulates Notch signaling in fly neuroblast lineages with high specificity. (A–C) Compared to WT control immature INPs, Notch (A) but not Wingless (Wg, B) or Patched (Ptc, C) puncta colocalizing with Rab7<sup>+</sup> endosomes were enlarged in *vps35* mutant dedifferentiating neural progenitors (arrowheads in islets in A–C). (D) In fly late third instar larval wing discs, Notch puncta colocalizing with Rab7<sup>+</sup> endosomes (arrowheads) remained unaltered in *vps35* mutant cells. (E, F) Larval brain lobes of indicated genotypes were stained for Dpn and Pros. Quantification of total neuroblast number per brain lobe is shown in (F). \*\*p<0.001; NS, not significant (n = 10–12). Scale bars, 50  $\mu$ m (E); 10  $\mu$ m (A–D).

DOI: <https://doi.org/10.7554/eLife.38181.012>



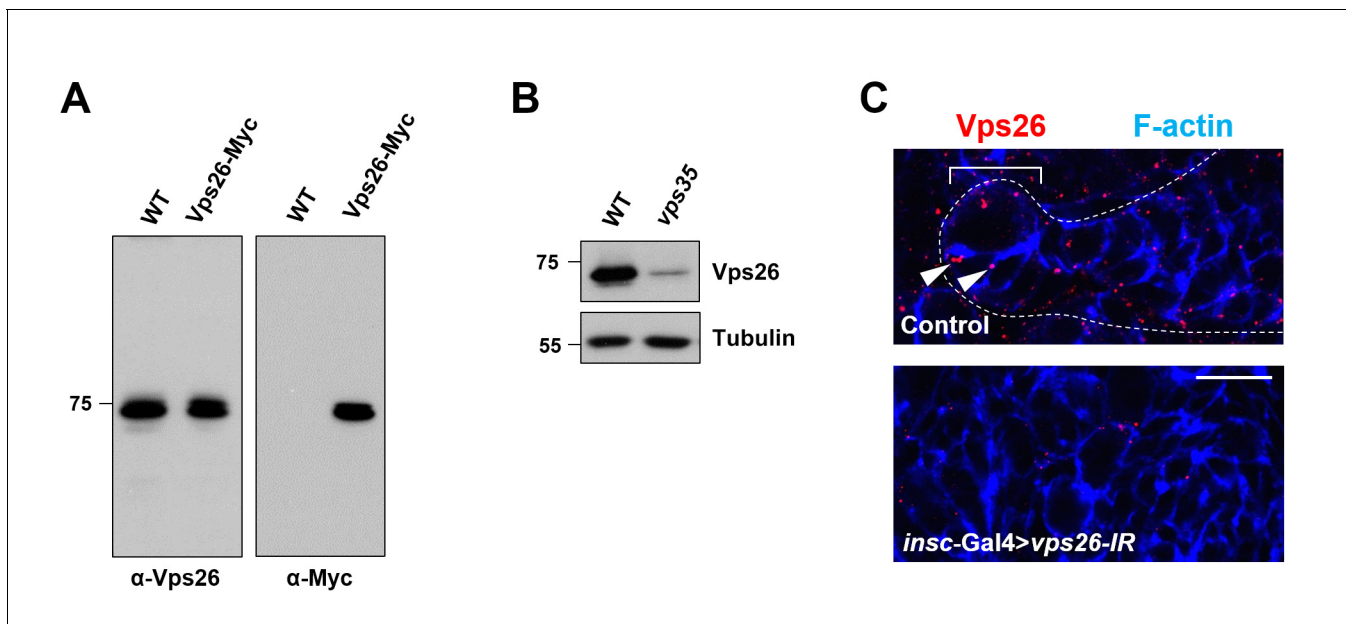

**Figure 3—figure supplement 3.** Antibody raised against Vps26 is highly specific. (A) Western blot analysis of wild type or *insc-Gal4 >UAS-Vps26-Myc* larval brain extracts using anti-Vps26 (left) or anti-Myc (right) antibody. (B) Compared to WT control, Vps26 expression levels in *vps35* mutant larval brain extracts were drastically reduced. Anti-α-Tubulin blot serves as loading control. (C) High and punctuated expression of Vps26 in type II neuroblast lineage (arrowheads) was diminished upon neuroblast-specific knockdown of *vps26*. Scale bar, 10 μm.

DOI: <https://doi.org/10.7554/eLife.38181.013>

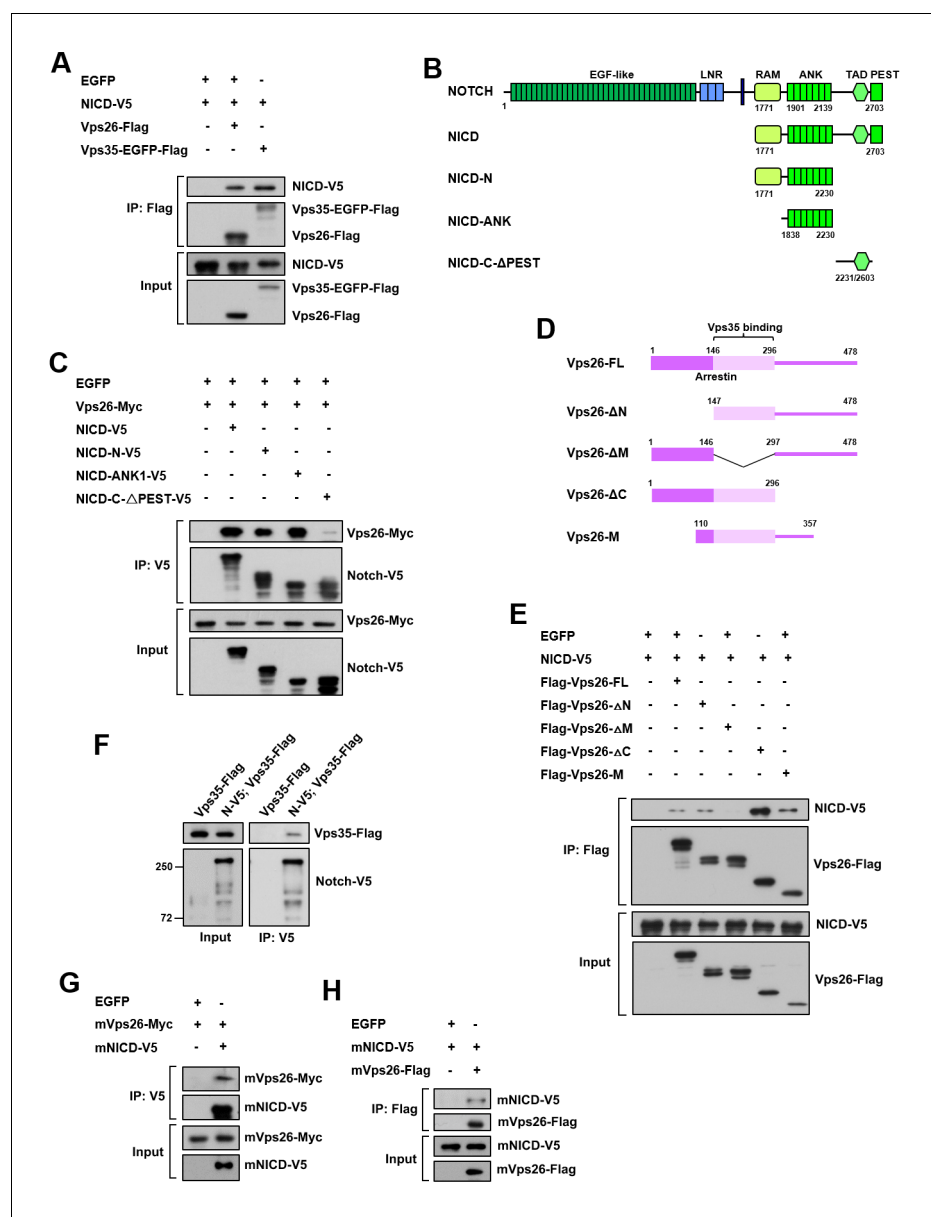

**Figure 4.** Retromer physically interacts with Notch. (A) Coimmunoprecipitation (CoIP) of FLAG-tagged Vps26 or Vps35 and V5-tagged Notch intracellular domain (NICD) in HEK293T cell extracts. Note that in these and subsequent panels, EGFP served as a negative control. (B) Schematic drawings of NICD protein domains and truncated constructs. (C) CoIP of full-length (FL) or truncated NICD-V5 and Vps26-Myc in HEK293T cells. (D) Schematic drawings of Vps26 protein domains and truncated constructs. (E) The reciprocal CoIP of full-length (FL) or truncated FLAG-Vps26 and NICD-V5 in HEK293T cells. (F) CoIP of Vps35-FLAG and Notch-V5 (N-V5) in fly larval brain extracts. Note that Vps35-FLAG and N-V5 were specifically expressed in neuroblast lineages by *insc*-Gal4. (G,H) CoIP of Myc-tagged mouse Vps26 (mVps26-Myc) and V5-tagged mouse NICD (mNICD-V5) and the reciprocal CoIP of mVps26-FLAG and mNICD-V5 in HEK293T cell extracts.

DOI: <https://doi.org/10.7554/eLife.38181.015>

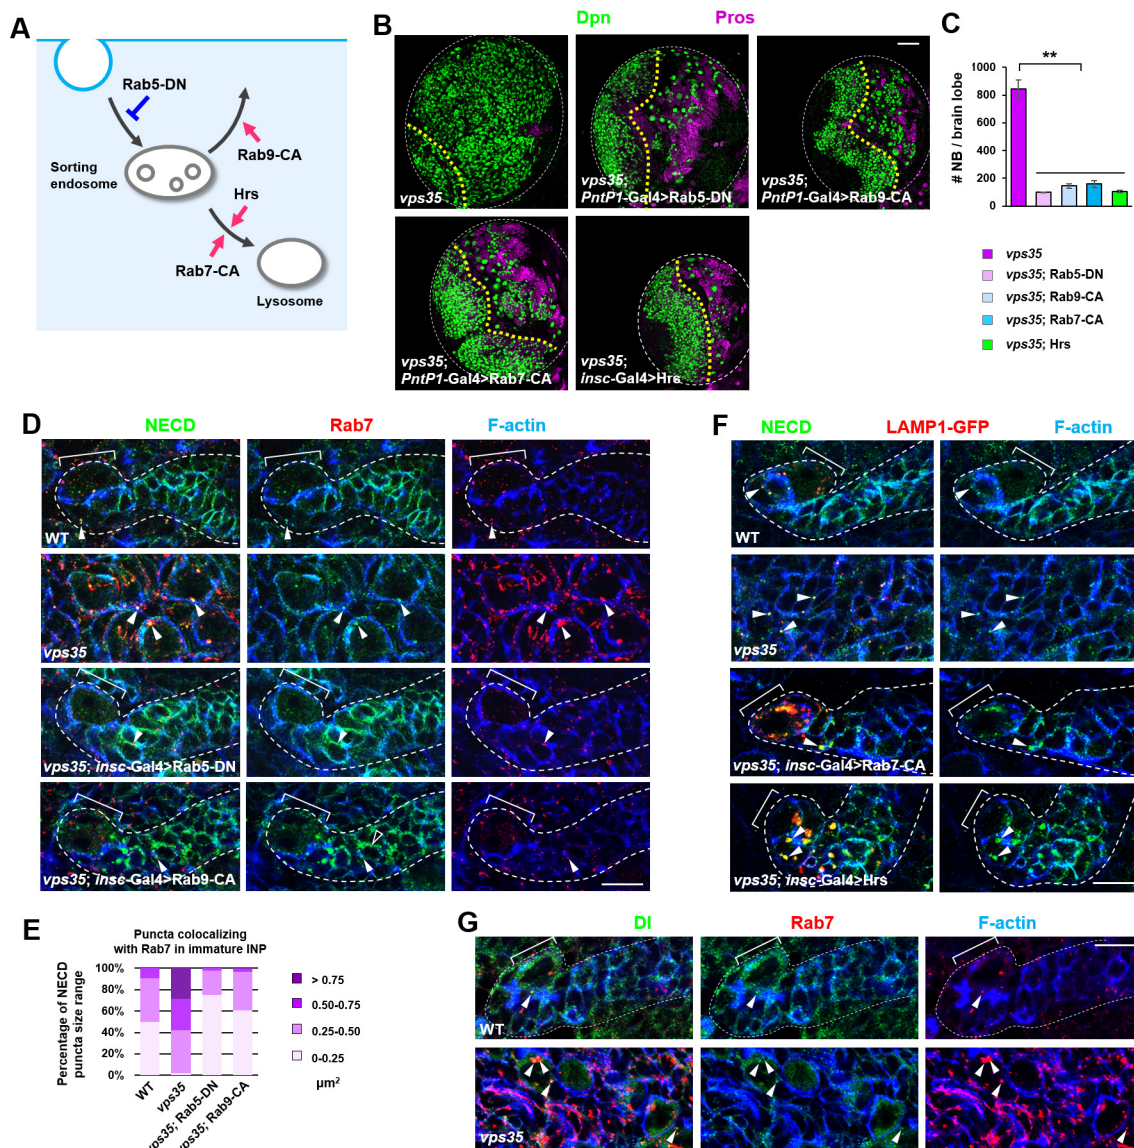

**Figure 5.** Retromer prevents intracellular ectopic cleavage of Notch receptors. (A) Schematic depicting a simplified endocytic pathway. Red arrow: promotion; blue flat line: inhibition. (B,C) Larval brain lobes of indicated genotypes were stained for Dpn and Pros. Quantification of total neuroblast number per brain lobe is shown in (C). \*\*p < 0.001 (n = 10–12). (D,E) Type II neuroblast lineages of indicated genotypes were stained for NECD, Rab7 and F-actin. NECD puncta colocalizing with Rab7 are marked with arrowheads. Quantification of the size range of Notch puncta colocalizing with Rab7<sup>+</sup> endosomes is shown in (E). (F) Type II neuroblast lineages of indicated genotypes were stained for NECD, GFP and F-actin. (G) Type II neuroblast lineages of indicated genotypes were stained for Delta, Rab7 and F-actin. Scale bars, 50  $\mu\text{m}$  (B) and 10  $\mu\text{m}$  (D,F,G).

DOI: <https://doi.org/10.7554/eLife.38181.016>

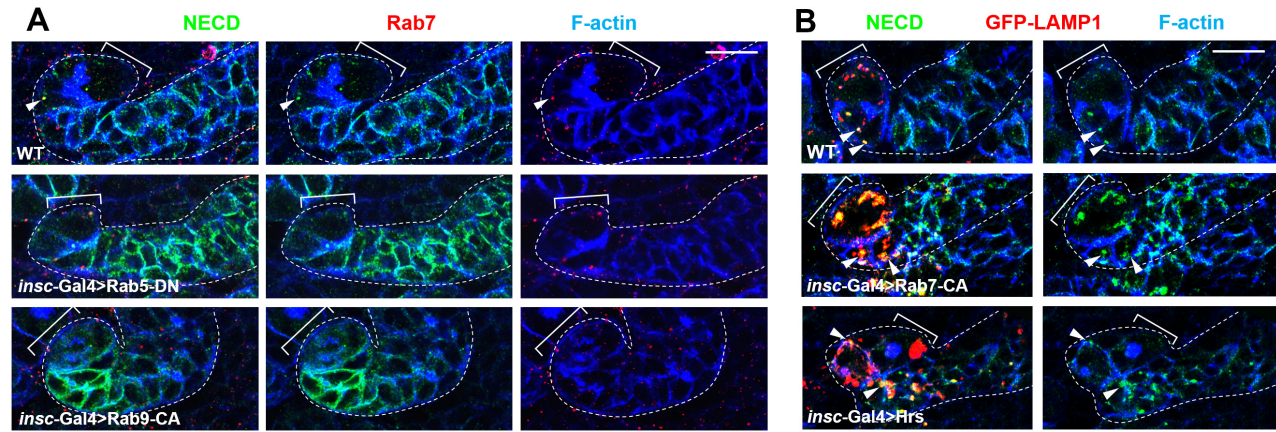

**Figure 5—figure supplement 1.** The effects of Rab5-DN, Rab9-CA, Rab7-CA or Hrs expression on Notch receptor trafficking. (A) Type II neuroblast lineages of indicated genotypes were stained for NECD, Rab7 and F-actin. NECD puncta colocalizing with Rab7 were marked with arrowheads. Note that expression of Rab5-DN or Rab9-CA resulted in increased cortical distribution of Notch and decreased colocalization between Notch and Rab7. (B) Type II neuroblast lineages of indicated genotypes were stained for NECD, GFP-LAMP1 and F-actin. Scale bars, 10 μm (A,B).

DOI: <https://doi.org/10.7554/eLife.38181.017>

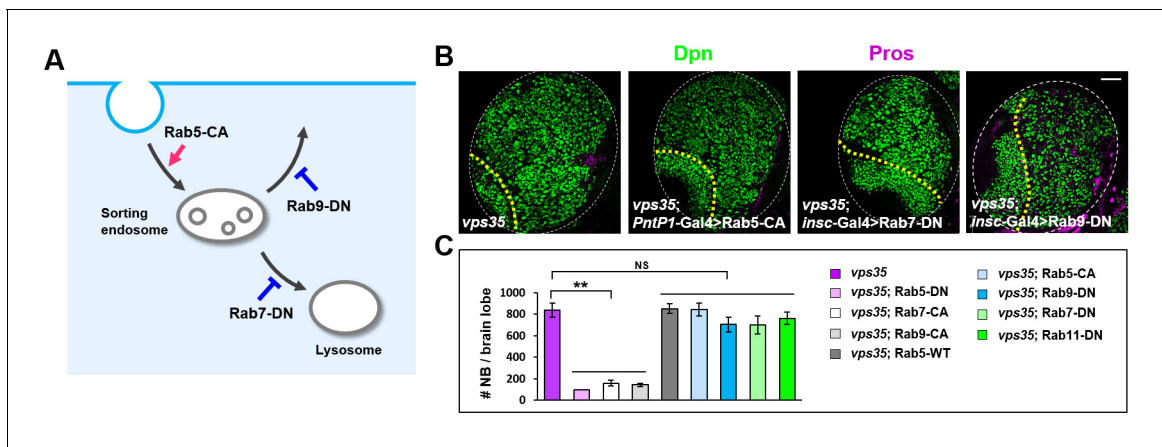

**Figure 5—figure supplement 2.** Overexpression of Rab5-CA, Rab7-DN or Rab9-DN failed to inhibit the brain tumor phenotype in *vps35* mutants. (A) Cartoon depicting a simplified endocytic pathway. Red arrow: promotion; blue flat line: inhibition. (B,C) Larval brain lobes of indicated genotypes were stained for Dpn and Pros. Quantification of total neuroblast number per brain lobe is shown in (C). \*\* $p < 0.001$ ; NS, not significant ( $n = 10-12$ ). Scale bar, 50  $\mu\text{m}$ .

DOI: <https://doi.org/10.7554/eLife.38181.018>



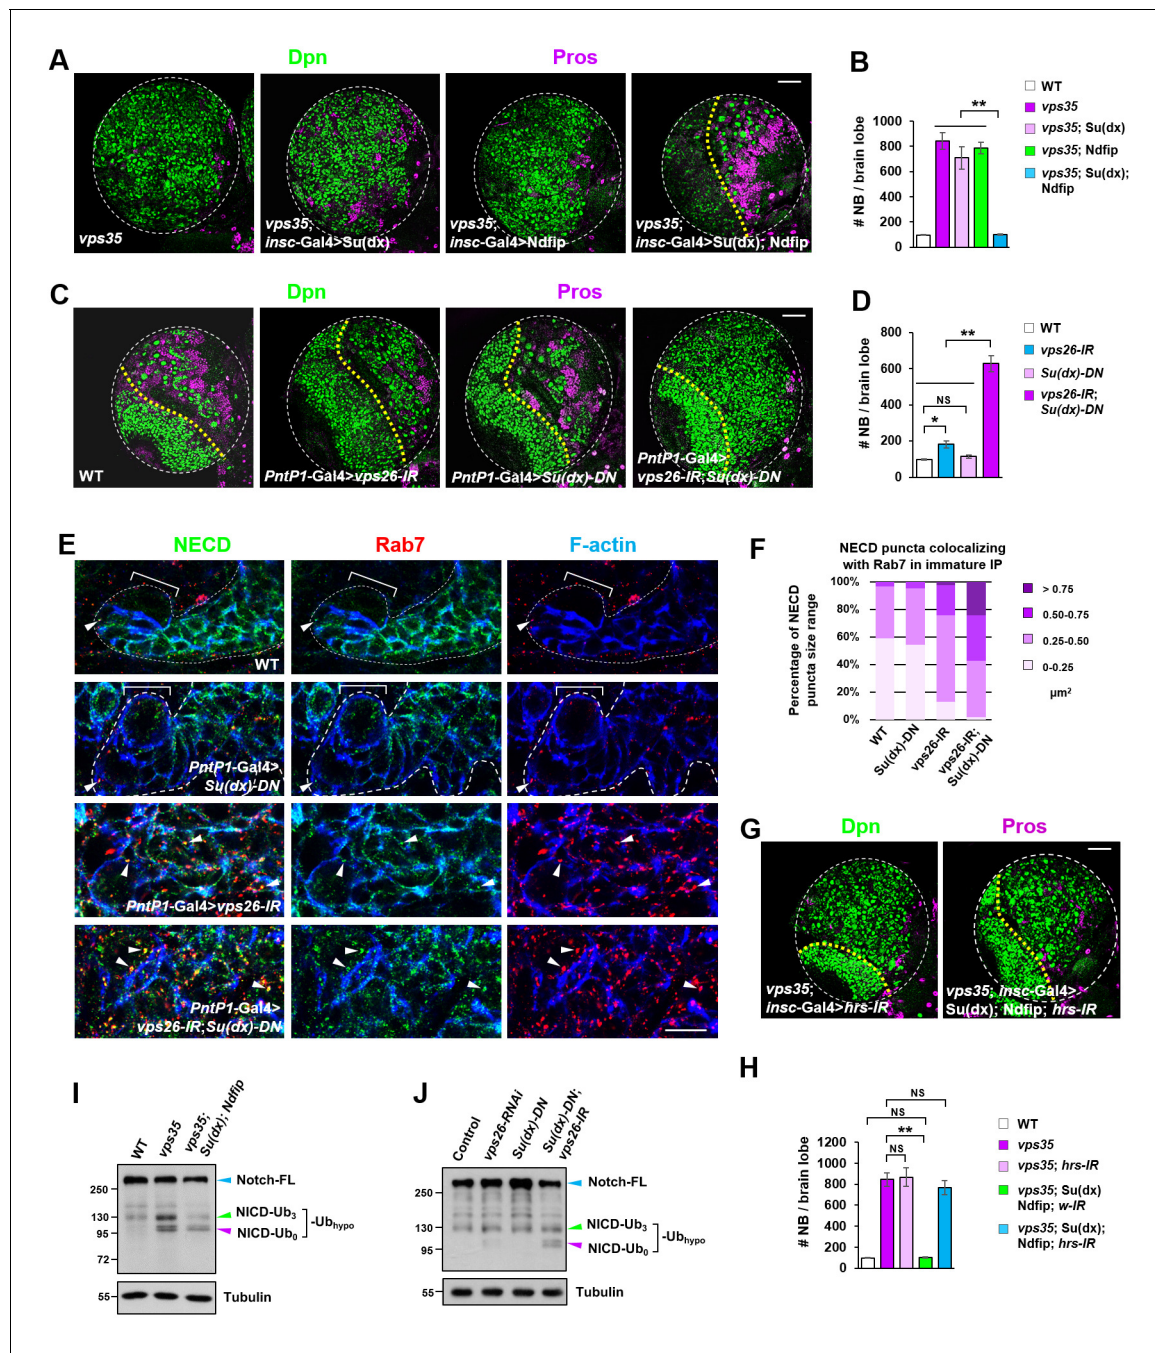

**Figure 6.** Retromer compensates for the inefficient Notch polyubiquitination and lysosomal degradation. (A,B) Neuroblast-specific coexpression of both *Su(dx)* and *Ndfip* but not either alone potently inhibited brain tumor phenotype in *vps35* mutants. Quantification of total neuroblast number of indicated genotypes is shown in (B). \*\* $p < 0.001$  ( $n = 12-15$ ). (C,D) Larval brain lobes of indicated genotypes were stained for Dpn and Pros. Quantification of total neuroblast number per brain lobe is shown in (D). \*\* $p < 0.001$ ; \* $p < 0.01$ ; NS, not significant ( $n = 13-15$ ). (E) Type II neuroblast lineages of indicated genotypes were stained for NECD, Rab7 and F-actin. NECD puncta colocalizing with Rab7 are marked with arrowheads. (F) Quantification of the size range of Notch puncta colocalizing with Rab7<sup>+</sup> endosomes in immature or dedifferentiating neural progenitors of indicated genotypes. (G,H) Larval brain lobes of indicated genotypes were stained for Dpn and Pros. Quantification of total neuroblast number per brain lobe is shown in (H). \*\* $p < 0.001$ ; NS, not significant ( $n = 11-15$ ). (I,J) Western blot analysis of larval brain extracts of indicated genotypes using anti-NICD antibody. Anti- $\alpha$ -tubulin blot served as a loading control. Note that hypo-ubiquitinated NICD fragments included NICD carrying approximately three ubiquitin moieties (NICD-Ub<sub>3</sub>) and un-ubiquitinated NICD (NICD-Ub<sub>0</sub>). Scale bars, 10  $\mu$ m (E) and 50  $\mu$ m (A,C,G).

DOI: <https://doi.org/10.7554/eLife.38181.020>

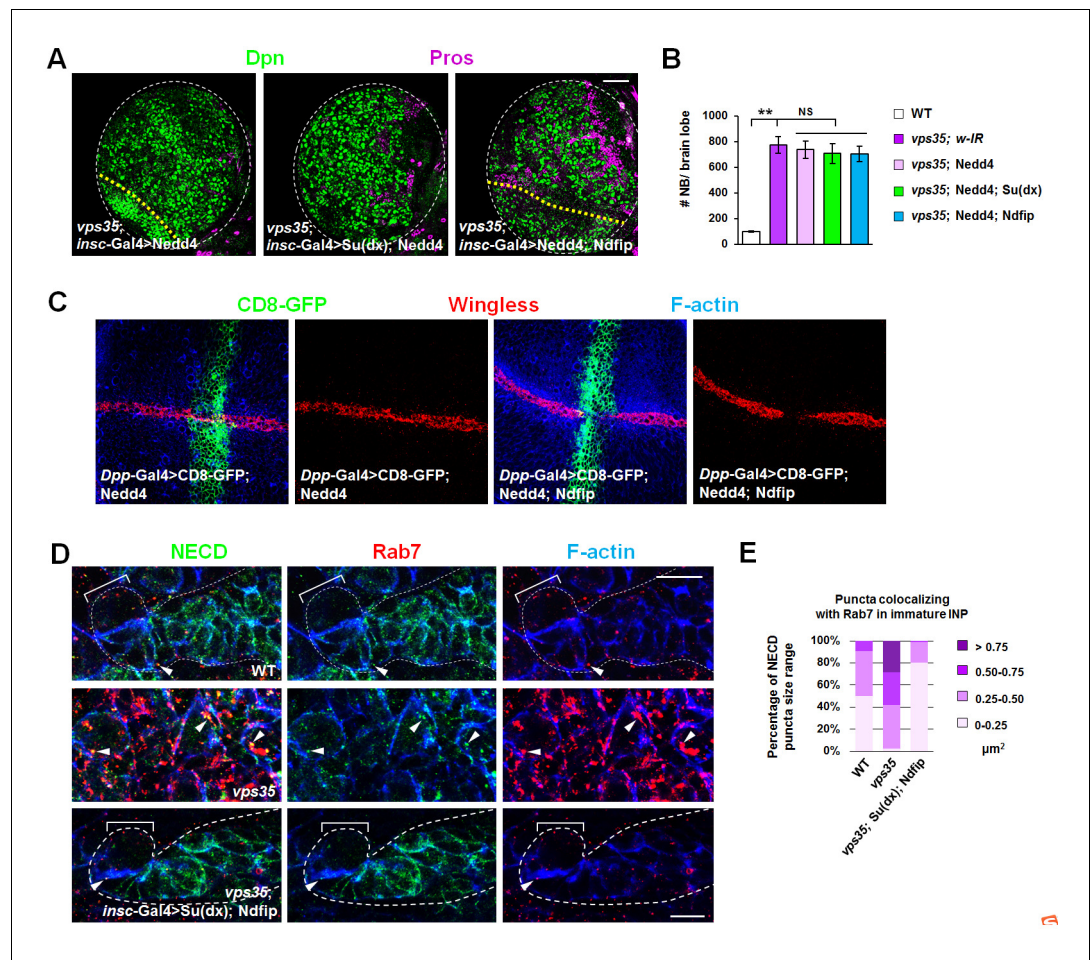

**Figure 6—figure supplement 1.** Coexpression of Su(dx) and Ndfip specifically suppresses brain tumor phenotypes in *vps35* mutants. (A,B) Larval brain lobes of indicated genotypes were stained for Dpn and Pros. Quantification of total neuroblast number per brain lobe is shown in (B). \*\* $p < 0.001$ ; NS, not significant ( $n = 10-15$ ). Note that coexpression of Nedd4 with Ndfip or Su(dx) failed to suppress the supernumerary neuroblast phenotype in *vps35* mutants. (C) Simultaneous expression of Su(dx) and Ndfip or Nedd4 and Ndfip potentially inhibited Wg expression in wing discs, indicating that the Nedd4 transgene is functional. (D,E) Enlarged NECD puncta colocalizing with Rab7<sup>+</sup> endosomes in *vps35* mutant dedifferentiating neural progenitors drastically shrank upon coexpression of Su(dx) and Ndfip (arrowheads in D). Quantification of the size range of NECD puncta colocalizing with Rab7<sup>+</sup> endosomes is shown in (E). Scale bars, 50  $\mu\text{m}$  (A) and 10  $\mu\text{m}$  (D).

DOI: <https://doi.org/10.7554/eLife.38181.021>

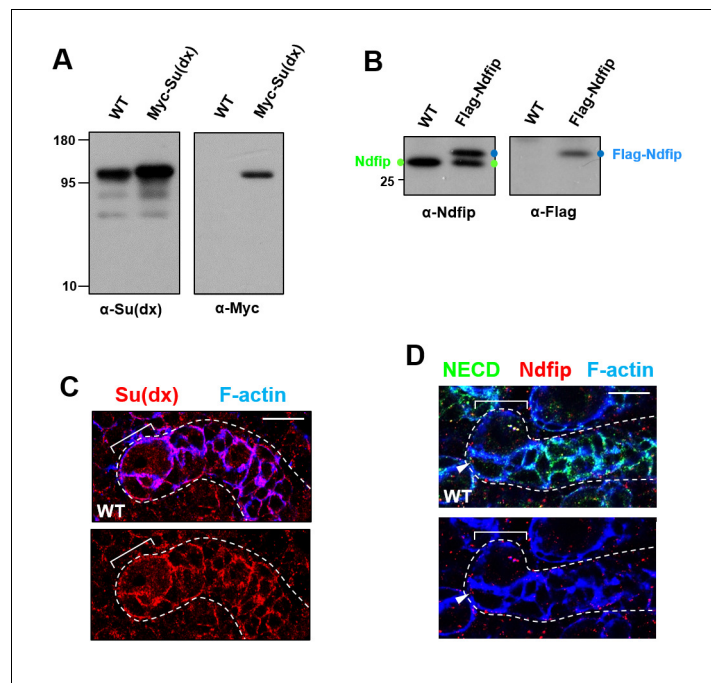

**Figure 6—figure supplement 2.** Distribution patterns of Su(dx) and Ndfip in type II neuroblast lineages. (A,B) Antibodies raised against Su(dx) (A) and Ndfip (B) are highly specific. Western blot analysis of wild type and *insc-Gal4 >UAS-Myc-Su(dx)* larval brain extracts (left) or wild type and *insc-GAL4 >UAS Flag-Ndfip* larval brain extracts (right) confirmed the specificity of Su(dx) and Ndfip antibodies respectively. (C,D) Su(dx) displayed cortical distribution in type II neuroblast lineages (C), whereas Ndfip showed largely punctuated distribution in type II neuroblast lineages (D). Scale bars, 10 μm (C,D).

DOI: <https://doi.org/10.7554/eLife.38181.022>



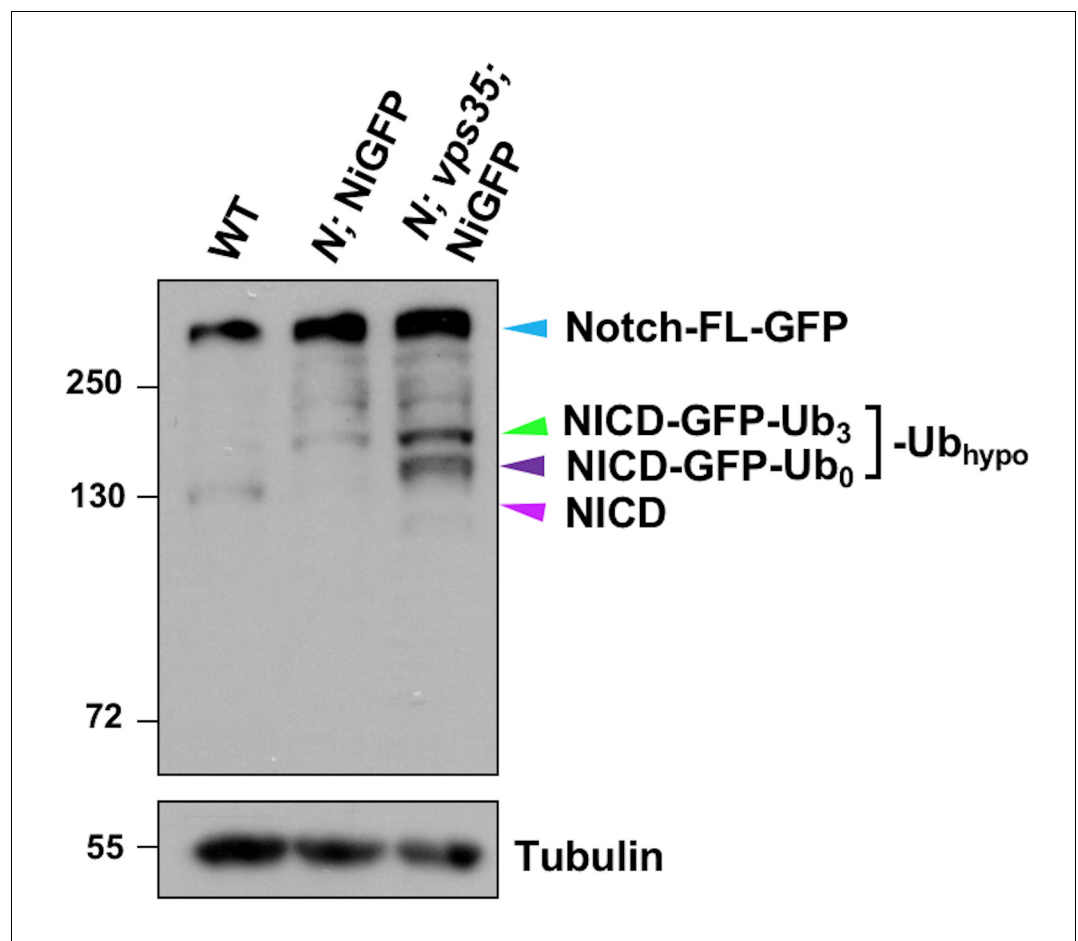

**Figure 6—figure supplement 3.** Proteolytic processing of NiGFP in *Notch* mutant or *Notch; vps35* double mutant larval brain extracts. Western blot analysis of wild type, *N<sup>55e11</sup>*; NiGFP or *N<sup>55e11</sup>*; NiGFP; *vps35* larval brain extracts using anti-NICD antibody. Anti- $\alpha$ -Tubulin blot serves here as a loading control. Note that NiGFP is a BAC transgene expressing a fully functional GFP-tagged Notch, whereas *N<sup>55e11</sup>* is a null mutant allele of Notch. Note that hypo-ubiquitinated NICD-GFP fusion includes NICD-GFP carrying approximately three ubiquitin moieties (NICD-GFP-Ub<sub>3</sub>; green arrowhead) and un-ubiquitinated NICD-GFP (NICD-GFP-Ub<sub>0</sub>; dark purple arrowhead) fragments. Also note that the cyan and light purple arrowheads indicate full-length Notch-GFP fusion (cyan) and NICD (purple) bands respectively.

DOI: <https://doi.org/10.7554/eLife.38181.023>

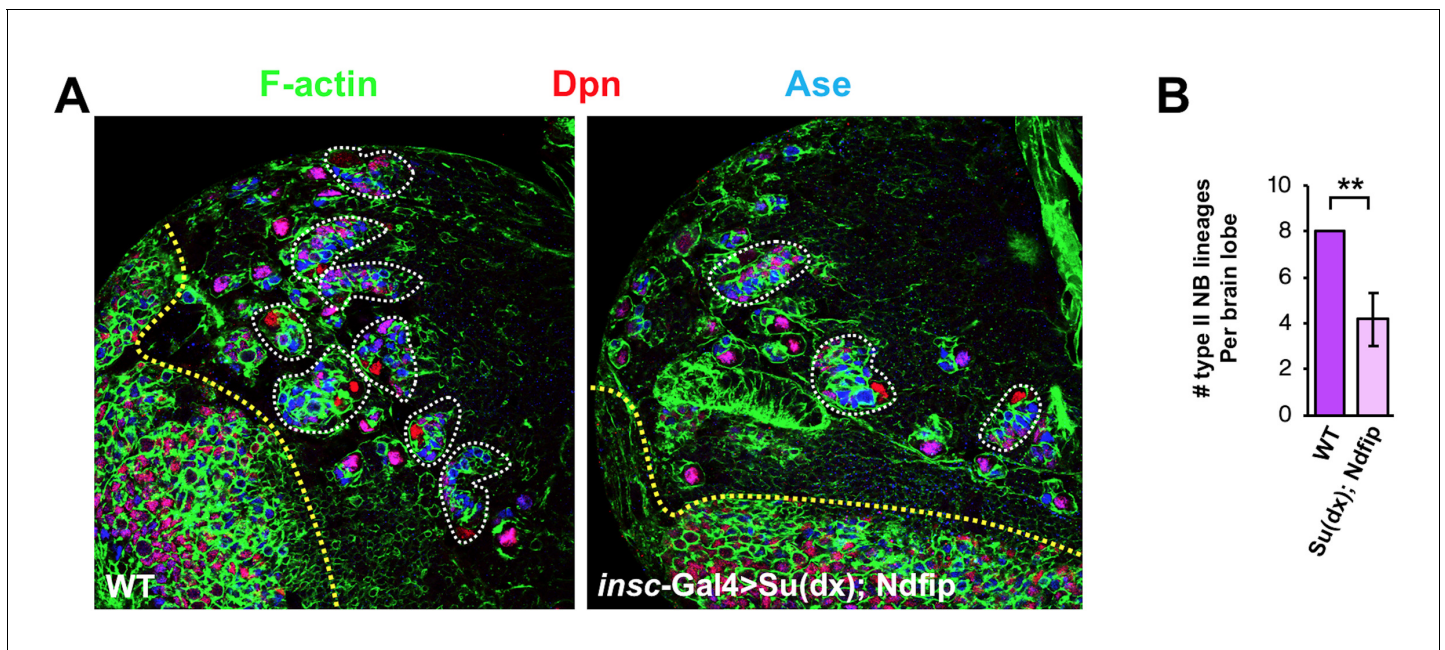

**Figure 6—figure supplement 4.** Co-overexpression of *Su(dx)* and *Ndfip* caused loss of type II neuroblast lineages and brain tissue atrophy. Larval brain lobes of WT or *insc-Gal4 >Su(dx); Ndfip* background were stained for Dpn and Ase. Each type II neuroblast lineage is encircled by dashed line. Quantification of type II neuroblast lineage number per brain lobe is shown in (B). \*\* $p < 0.001$  ( $n = 10-12$ ).

DOI: <https://doi.org/10.7554/eLife.38181.024>

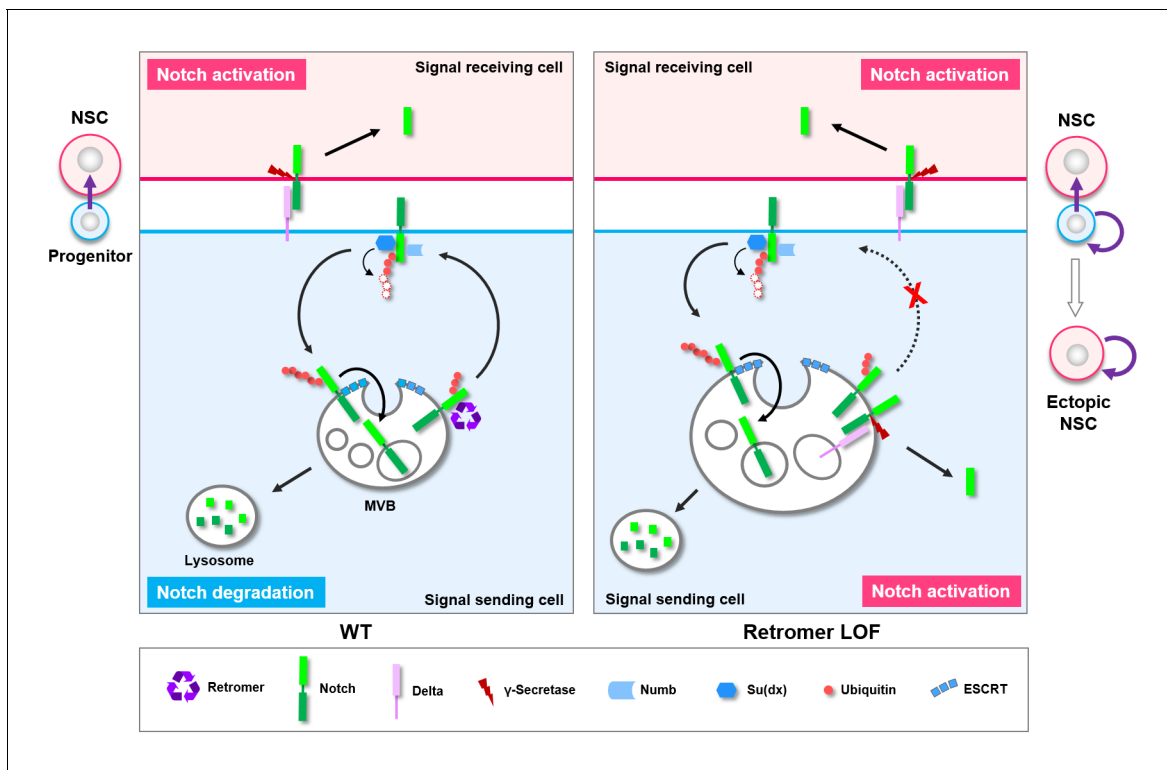

**Figure 7.** Working model. A graphic model depicting a safeguard mechanism whereby retromer ensures unidirectional Notch signaling (purple arrow) from neural progenitor (light blue) to neural stem cell (NSC; pink) by preventing cell-autonomous ectopic Notch signaling activation in neural progenitors. Retromer (purple) normally interacts with Notch (green) and retrieves the pool of hypoubiquitinated Notch evading the ESCRT (cyan)-lysosomal degradation pathway and sends it back to the cell surface (left panel). Upon retromer dysfunction, hypoubiquitinated Notch is accumulate in MVBs and aberrantly cleaved by  $\gamma$ -secretase (brown) in a ligand (light purple)-dependent manner, causing neural progenitor-originated tumorigenesis (right panel).

DOI: <https://doi.org/10.7554/eLife.38181.026>
